# Supplementary material for: Combined ground and aerial measurements resolve vent-specific gas fluxes from a multi-vent volcano
Source: PubMed Central journal article supplement (PMC7298010; doi:10.1038/s41467-020-16862-w), 2020-06-16
Supplement: 41467_2020_16862_MOESM2_ESM.pdf [file 41467_2020_16862_MOESM2_ESM.pdf]

## **Description of Additional Supplementary Files**

### Supplementary Movie 1

Video footage acquired with an UAS, which includes an overflight of the whole summit area; footage during a strombolian explosion from vent S1, where explosive gas release at one vent is preceded by a ~1 s doming at a second vent in close proximity; and a close-up of puffing at vent area C.
